# Supplementary material for: Co-delivery of Doxorubicin and Bmi1 siRNA by Folate Receptor Targeted Liposomes Exhibits Enhanced Anti-Tumor Effects in vitro and in vivo
Source: PubMed Central journal article supplement — Theranostics. 2014 Aug 24;4(11):1096–111. doi: 10.7150/thno.9423 (PMC4173760; doi:10.7150/thno.9423), 2014-08-24
Supplement: thnov04p1096s1.pdf [file thnov04p1096s1.pdf]

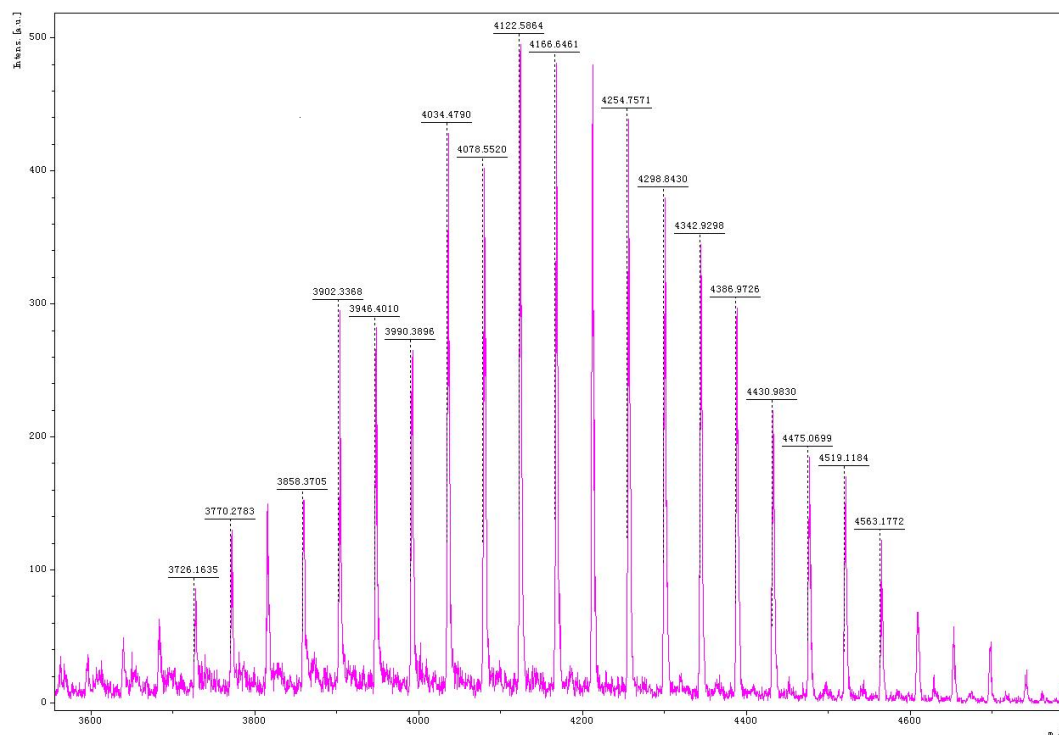

Figure S1. Mass spectrum of FA-PEG-Chol. The calculated molecular weight of FA-PEG-Chol is 4142 Da and the mass spectrum was determined by matrix-assisted laser desorption/ionization time of flight mass spectroscopy. The fragments of FA-PEG-Chol were distributed as bell shape centered at 4122 Da, consistent with calculated molecular weight.

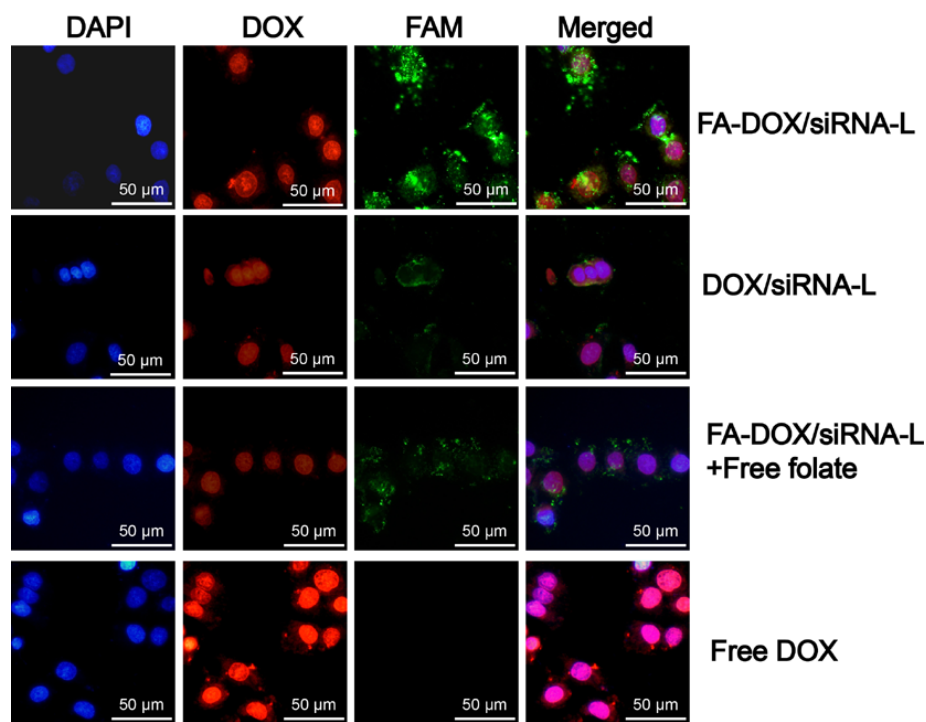

Figure S2. Co-localization of Bmi1 siRNA and DOX in HeLa cells. HeLa cells grown in a monolayer were incubated with free DOX, DOX/siRNA-L, FA-DOX/siRNA-L and for 1 h at 37°C. For folate blocking group, 1 mM free folate was added to the incubation media prior to the addition of FA-DOX/siRNA-L. Bmi1 siRNA was labeled with FAM (Green) and DOX emits red fluorescence by itself. The nucleus was counterstained with DAPI (Blue).
